# Supplementary material
Source: PubMed Central journal article supplement (PMC4256880)
Supplement: supp_pp.114.244673_244673Sherrier_Supplemental_Figure1_Plant_Phys.pdf [file supp_pp.114.244673_244673Sherrier_Supplemental_Figure1_Plant_Phys.pdf]

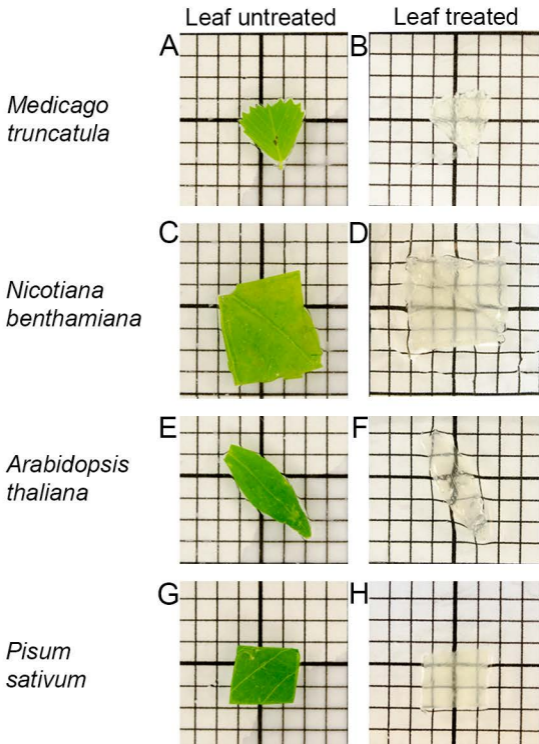

Figure S1 Clearing effects in monocot and dicot leaf tissues. Images acquired using a Nikon D700 camera of *M. truncatula* (A,B), *N. benthamiana* (C,D), *A. thaliana* (E,F), and *P. sativum* (G,H), leaves before and after clearing. By week 3 of clearing, samples become optically clear evident against patterned backgrounds. Grid squares equal 15 mm.
